# Supplementary material for: Temporal Changes of Fish Diversity and Driver Factors in a National Nature Reserve, China
Source: MDPI journal article supplement (doi:10.3390/ani12121544), 2022-06-14
Supplement: s1 [file s1]

**Table S2** Composition of fish catch in the Lushan National Nature Reserve in 2021

| Species                           | <i>N</i> (%) | <i>W</i> (%) | <i>IRI</i> | Range of body length (cm) | Average body length (cm) | Range of weight (g) | Average weight (g) |
|-----------------------------------|--------------|--------------|------------|---------------------------|--------------------------|---------------------|--------------------|
| <i>Zacco platypus</i>             | 72.16        | 56.09        | 11838.26   | 3.2-12.3                  | 6.4                      | 0.1-41.2            | 5.2                |
| <i>Rhinogobius giurinus</i>       | 6.49         | 1.71         | 756.93     | 2.8-7.0                   | 4.1                      | 0.2-6.7             | 1.5                |
| <i>Acrossocheilus parallens</i>   | 5.57         | 9.03         | 785.82     | 3.1-13.0                  | 7.3                      | 0.3-48.5            | 10.3               |
| <i>Opsariichthys bidens</i>       | 4.54         | 9.27         | 530.84     | 4.7-16.2                  | 9.0                      | 1.9-61.3            | 12.8               |
| <i>Misgurnus anguillicaudatus</i> | 3.43         | 3.43         | 316.31     | 6.3-12.3                  | 9.6                      | 2.6-18.6            | 9.6                |
| <i>Liobagrus anguillicauda</i>    | 1.72         | 1.52         | 174.56     | 4.0-9.5                   | 6.4                      | 0.7-14.0            | 5.5                |
| <i>Rhodeus ocellatus</i>          | 1.66         | 0.41         | 31.88      | 2.1-5.6                   | 3.8                      | 0.3-4.0             | 1.5                |
| <i>Odontobutis sinensis</i>       | 1.32         | 3.79         | 235.99     | 4.0-13.5                  | 8.3                      | 1.1-67.5            | 18.0               |
| <i>Monopterus albus</i>           | 0.98         | 5.18         | 284.09     | 7.4-60.0                  | 19.6                     | 3.5-187.9           | 33.2               |
| <i>Carassius auratus</i>          | 0.75         | 3.36         | 126.42     | 7.0-13.0                  | 9.3                      | 13.3-78.5           | 28.2               |
| <i>Pseudorasbora parva</i>        | 0.69         | 0.62         | 40.17      | 4.8-9.3                   | 6.5                      | 1.6-14.6            | 5.6                |
| <i>Belligobio nummifer</i>        | 0.69         | 1.87         | 39.40      | 4.6-13.2                  | 10.0                     | 1.5-33.3            | 17.0               |
| <i>Pseudobagrus ondon</i>         | 0.63         | 1.02         | 38.21      | 4.7-12.2                  | 8.2                      | 2.0-22.0            | 10.1               |
| <i>Gnathopogon imberbis</i>       | 0.34         | 0.51         | 6.60       | 6.0-9.1                   | 7.6                      | 5.0-15.8            | 9.3                |
| <i>Abbottina rivularis</i>        | 0.11         | 0.23         | 2.68       | 5.0-12.0                  | 8.5                      | 2.0-23.4            | 12.7               |
| <i>Channa argus</i>               | 0.11         | 1.96         | 15.93      | 10.5-25.5                 | 18.0                     | 17.0-196.2          | 106.6              |
