# Supplementary material for: Temporal Changes of Fish Diversity and Driver Factors in a National Nature Reserve, China
Source: MDPI journal article supplement (doi:10.3390/ani12121544), 2022-06-14
Supplement: s1 [file s1]

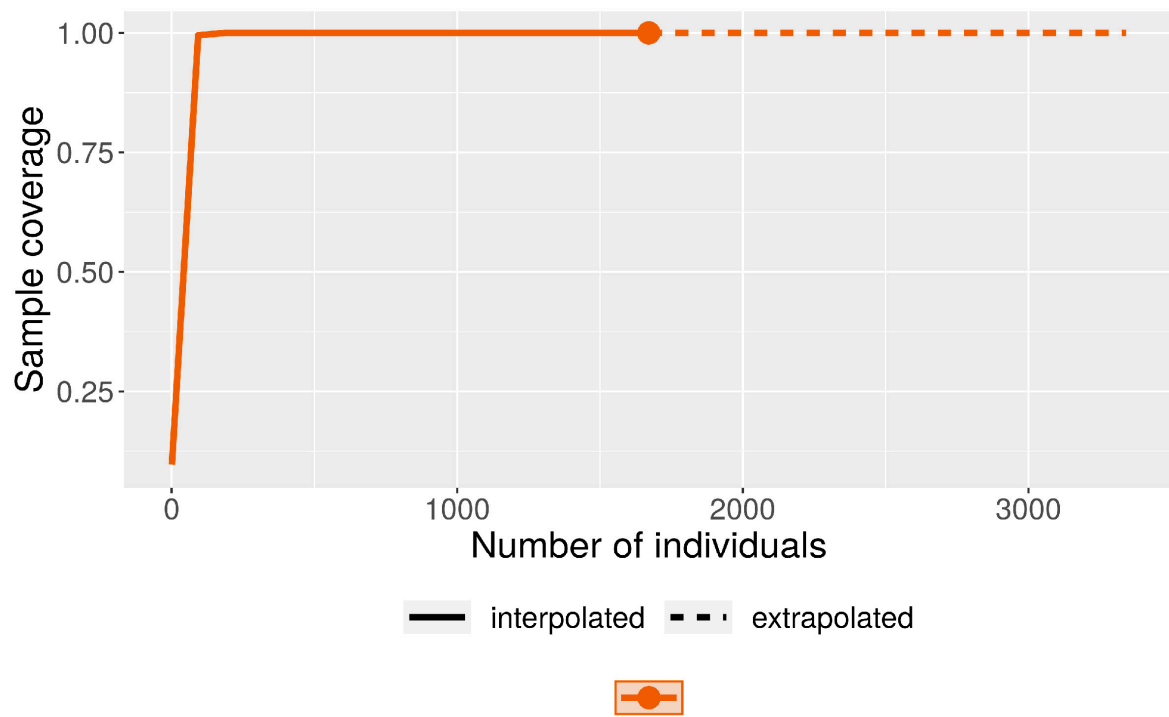

**Figure S1.** Species accumulation curves for fish at each area in the Lushan National Nature Reserve. Shaded areas represent the 95% confidence intervals.
