# Supplementary material for: Temporal Changes of Fish Diversity and Driver Factors in a National Nature Reserve, China
Source: MDPI journal article supplement (doi:10.3390/ani12121544), 2022-06-14
Supplement: s1 [file s1]

**Table S1** The number of total, native and alien species in the Lushan National Nature Reserve in 2008 and 2021. The threatened species (i.e. CR, EN, VU or NT) are those according to threatened status based on Chinese Red-list results. Native species: Native to China; Alien species: Nonnative to China.

| River | Number of order |      | Number of family |      | Number of genus |      | Number of species |      | Threatened species |      | Native species |      | Alien species |      |
|-------|-----------------|------|------------------|------|-----------------|------|-------------------|------|--------------------|------|----------------|------|---------------|------|
|       | 2008            | 2021 | 2008             | 2021 | 2008            | 2021 | 2008              | 2021 | 2008               | 2021 | 2008           | 2021 | 2008          | 2021 |
| THY   | 2               | 2    | 2                | 2    | 5               | 4    | 5                 | 4    | 0                  | 0    | 5              | 4    | 0             | 0    |
| GZ    | 3               | 3    | 4                | 4    | 9               | 5    | 9                 | 5    | 0                  | 0    | 9              | 5    | 0             | 0    |
| XF    | 3               | 3    | 4                | 4    | 6               | 8    | 6                 | 8    | 0                  | 0    | 6              | 8    | 0             | 0    |
| GYQ   | 2               | 3    | 4                | 5    | 6               | 9    | 6                 | 9    | 0                  | 0    | 6              | 9    | 0             | 0    |
| GL    | 3               | 2    | 4                | 4    | 11              | 7    | 11                | 7    | 0                  | 0    | 11             | 7    | 0             | 0    |
| TY    | 3               | 2    | 4                | 2    | 10              | 2    | 10                | 2    | 0                  | 0    | 10             | 2    | 0             | 0    |
| JDX   | 3               | 3    | 4                | 4    | 5               | 6    | 5                 | 6    | 0                  | 0    | 5              | 6    | 0             | 0    |
| LH    | 3               | 4    | 4                | 4    | 7               | 4    | 7                 | 4    | 0                  | 0    | 7              | 4    | 0             | 0    |
| WJ    | 1               | 2    | 1                | 3    | 1               | 6    | 1                 | 6    | 0                  | 0    | 1              | 6    | 0             | 0    |
| SMJ   | 2               | 4    | 3                | 7    | 5               | 8    | 5                 | 8    | 0                  | 0    | 5              | 8    | 0             | 0    |
| WLQ   | 3               | 4    | 5                | 8    | 8               | 11   | 8                 | 11   | 0                  | 0    | 8              | 11   | 0             | 0    |
| HH    | 2               | 4    | 4                | 5    | 6               | 7    | 6                 | 7    | 0                  | 0    | 6              | 7    | 0             | 0    |
| LMG   | —               | 2    | —                | 2    | —               | 2    | —                 | 2    | —                  | 0    | —              | 2    | —             | 0    |
| OTM   | 4               | —    | 5                | —    | 5               | —    | 5                 | —    | 0                  | —    | 5              | —    | 0             | —    |
